# Supplementary material for: Hydrochlorination of acetylene catalyzed by mesoporous carbon with hierarchical assembly of polyimide nanosheets
Source: Royal Society of Chemistry journal article supplement (doi:10.1039/d3nj01710a), 2023-01-01
Supplement: d3nj01710a1.pdf [file d3nj01710a1.pdf]

1

## *Supplementary Material*

2

### 3 **Hydrochlorination of acetylene catalyzed by mesoporous** 4 **carbon with hierarchical assembly of polyimide nanosheets**

5 Zihan Guo <sup>a</sup>, Wencai Peng <sup>a</sup>, Jian Li <sup>a, c</sup>, Feng Li <sup>a</sup>, Qiangang Zhang <sup>a</sup>, Lijie Yang <sup>a</sup>,

6 Dongyang Xie <sup>a</sup>, Yanzhao Dong <sup>a\*</sup>, Jinli Zhang <sup>a, b</sup> and Haiyang Zhang <sup>a\*</sup>

7 <sup>a</sup> *School of Chemistry and Chemical Engineering/*

8 *State Key Laboratory Incubation Base for Green Processing of Chemical Engineering,*

9 *Shihezi University, Shihezi, Xinjiang, 832000, P.R. China;*

10 <sup>b</sup> *School of Chemical Engineering and Technology, Tianjin University, Jinnan District,*

11 *Tianjin, 300072, P.R. China.*

12 <sup>c</sup> *Yunnan Precious Metals Lab Co., Ltd, Kunming 650106, P. R. China.*

13 \* Corresponding authors.

14 Fax: +86-993-2057006; Tel: +86-993-2057006;

15 *E-mail address:* [yzdong2012@shzu.edu.cn](mailto:yzdong2012@shzu.edu.cn) (Y. Dong);

16 [zhy198722@163.com](mailto:zhy198722@163.com)(H. Zhang);

18 **Table of contents:**

19 **Table S1** Comparison of performance of the reported non-metallic catalysts for  
20 acetylene hydrochlorination reaction in recent years.

21 **Table S2** Relative atomic percentage of different O-containing species, determined by  
22 XPS.

23 **Figure S1** Comparison of stability of NPCs-900 and AC catalysts in the acetylene  
24 hydrochlorination reaction.

25 **Figure S2** TG curves of the fresh and spent catalysts recorded in air atmosphere.

27 **Table S1** Comparison of performance of the reported non-metallic catalysts for acetylene  
 28 hydrochlorination reaction in recent years.

| Catalysts                     | Conversion of Acetylene (%) | Conditions                                                                                                             | Ref.      |
|-------------------------------|-----------------------------|------------------------------------------------------------------------------------------------------------------------|-----------|
| Z <sub>4</sub> M <sub>1</sub> | 60                          | 180°C, GHSV(C <sub>2</sub> H <sub>2</sub> ) = 50 h <sup>-1</sup> , and V(HCl)/V(C <sub>2</sub> H <sub>2</sub> ) = 1.15 | 1         |
| PANI-AC-900                   | 76                          | 180°C, GHSV(C <sub>2</sub> H <sub>2</sub> ) = 36 h <sup>-1</sup> , and V(HCl)/V(C <sub>2</sub> H <sub>2</sub> ) = 1.1  | 2         |
| N@CBC-FE                      | 75                          | 220°C, GHSV(C <sub>2</sub> H <sub>2</sub> ) = 50 h <sup>-1</sup> , and V(HCl)/V(C <sub>2</sub> H <sub>2</sub> ) = 1.1  | 3         |
| MF-600                        | 95                          | 220°C, GHSV(C <sub>2</sub> H <sub>2</sub> ) = 30 h <sup>-1</sup> , and V(HCl)/V(C <sub>2</sub> H <sub>2</sub> ) = 1.2  | 4         |
| 20%[DBU]<br>[Cl]/AC           | 86                          | 240°C, GHSV(C <sub>2</sub> H <sub>2</sub> ) = 30 h <sup>-1</sup> , and V(HCl)/V(C <sub>2</sub> H <sub>2</sub> ) = 1.2  | 5         |
| DF/BC-850                     | 92                          | 220°C, GHSV(C <sub>2</sub> H <sub>2</sub> ) = 45 h <sup>-1</sup> , and V(HCl)/V(C <sub>2</sub> H <sub>2</sub> ) = 1.15 | 6         |
| 1.00NPC                       | 87                          | 220°C, GHSV(C <sub>2</sub> H <sub>2</sub> ) = 30 h <sup>-1</sup> , and V(HCl)/V(C <sub>2</sub> H <sub>2</sub> ) = 1.2  | 7         |
| PACP-800                      | 84                          | 180°C, GHSV(C <sub>2</sub> H <sub>2</sub> ) = 30 h <sup>-1</sup> , and V(HCl)/V(C <sub>2</sub> H <sub>2</sub> ) = 1.15 | 8         |
| NPCs-900                      | 91                          | 180°C, GHSV(C <sub>2</sub> H <sub>2</sub> ) = 30 h <sup>-1</sup> , and V(HCl)/V(C <sub>2</sub> H <sub>2</sub> ) = 1.15 | This work |

29

30 **Table S2** Relative atomic percentage of different O-containing species, determined by XPS.

| Samples   | Atomic O (at%) | Area (%) |       |
|-----------|----------------|----------|-------|
|           |                | C=O      | C-OH  |
| NPCs-600  | 11.52          | 51.67    | 48.33 |
| NPCs-700  | 9.58           | 54.33    | 45.67 |
| NPCs-800  | 12.31          | 57.06    | 42.94 |
| NPCs-900  | 12.19          | 57.93    | 42.07 |
| NPCs-1000 | 10.61          | 53.78    | 46.22 |

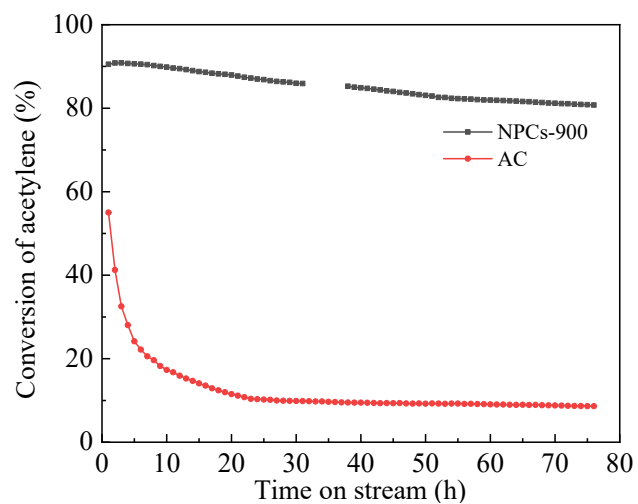

31

32

33

34

**Figure S1.** Comparison of stability of NPCS-900 and AC catalysts in the acetylene hydrochlorination reaction. Reaction conditions:  $T = 180^{\circ}\text{C}$ ,  $\text{GHSV}(\text{C}_2\text{H}_2) = 30 \text{ h}^{-1}$ , and  $V(\text{HCl})/V(\text{C}_2\text{H}_2) = 1.15$ .

36

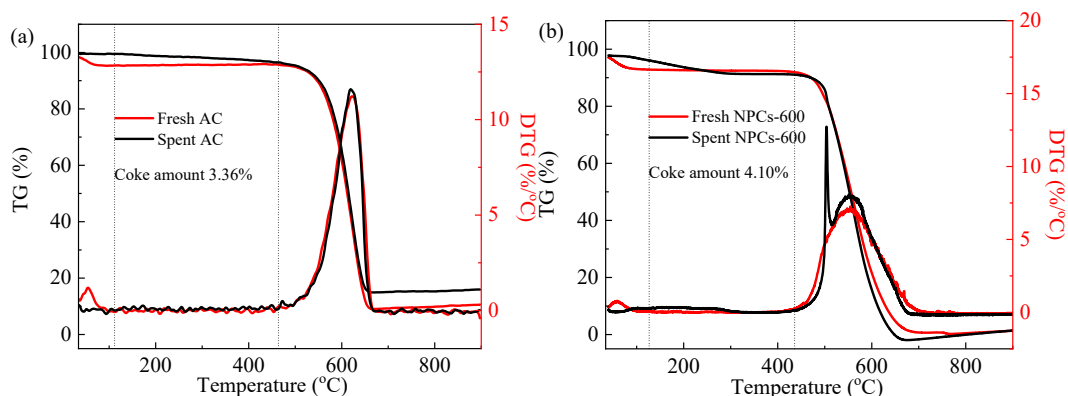

37

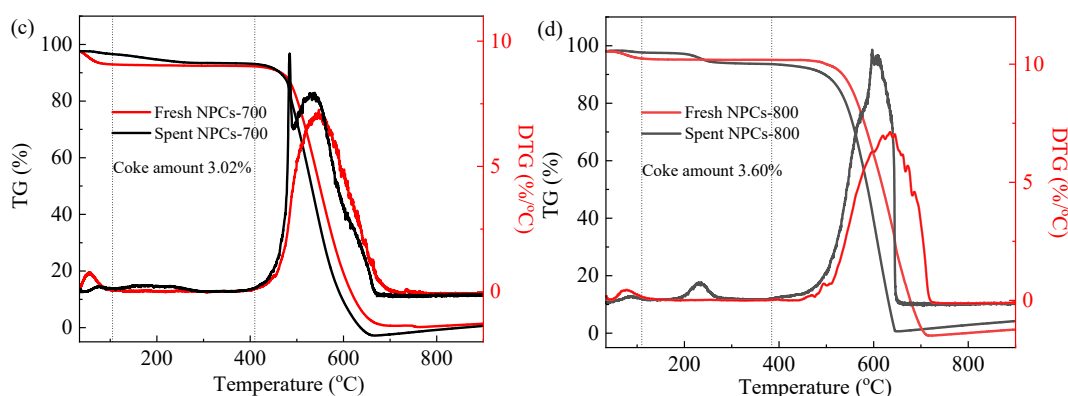

38

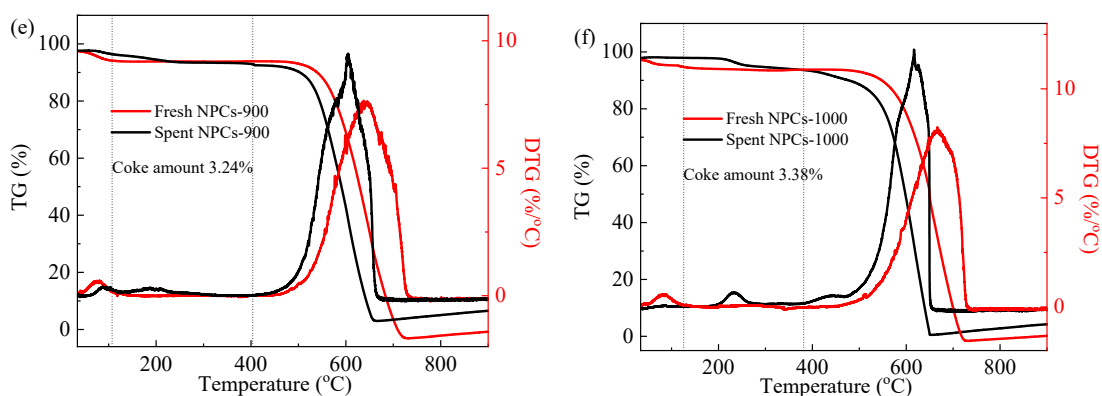

39

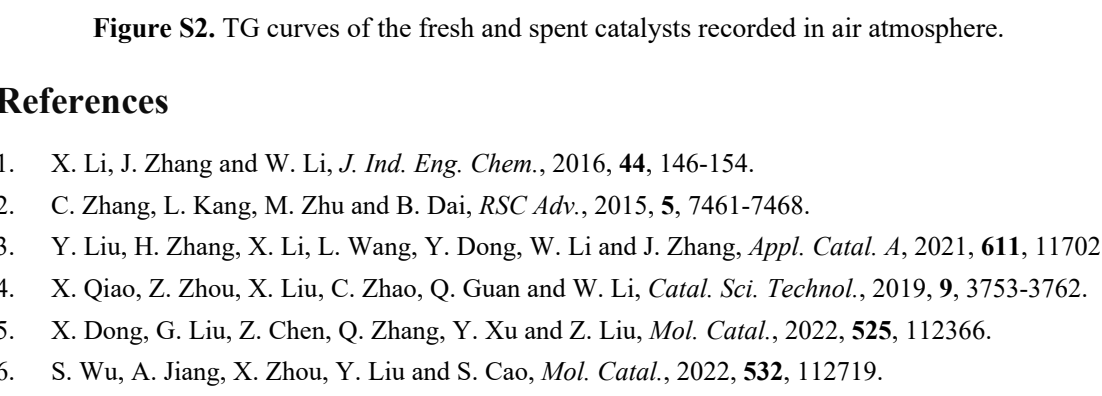

40

**Figure S2.** TG curves of the fresh and spent catalysts recorded in air atmosphere.

## 41 References

- 42 1. X. Li, J. Zhang and W. Li, *J. Ind. Eng. Chem.*, 2016, **44**, 146-154.
- 43 2. C. Zhang, L. Kang, M. Zhu and B. Dai, *RSC Adv.*, 2015, **5**, 7461-7468.
- 44 3. Y. Liu, H. Zhang, X. Li, L. Wang, Y. Dong, W. Li and J. Zhang, *Appl. Catal. A*, 2021, **611**, 11702.
- 45 4. X. Qiao, Z. Zhou, X. Liu, C. Zhao, Q. Guan and W. Li, *Catal. Sci. Technol.*, 2019, **9**, 3753-3762.
- 46 5. X. Dong, G. Liu, Z. Chen, Q. Zhang, Y. Xu and Z. Liu, *Mol. Catal.*, 2022, **525**, 112366.
- 47 6. S. Wu, A. Jiang, X. Zhou, Y. Liu and S. Cao, *Mol. Catal.*, 2022, **532**, 112719.
- 48 7. S. Wei, Y. Qiu, X. Sun, X. Wang, H. Li, G. Lan, J. Liu and Y. Li, *ACS Sustain. Chem. Eng.*, 2022,
- 49 **10**, 10476-10485.
- 50 8. F. Li, H. Zhang, M. Zhang, L. Li, L. Yao, W. Peng and J. Zhang, *ACS Sustain. Chem. Eng.*, 2022,

51 **10**, 194-203.

52
